# Supplementary figures and images for: Polyphenols suppress inducible oxidative stress in human osteoarthritic and bovine chondrocytes
Source: PubMed Central journal article supplement — Osteoarthr Cartil Open. 2020 Apr 9;2(3):100064. doi: 10.1016/j.ocarto.2020.100064 (PMC9718082; doi:10.1016/j.ocarto.2020.100064), 2020-04-09

## PPC Co-treatment

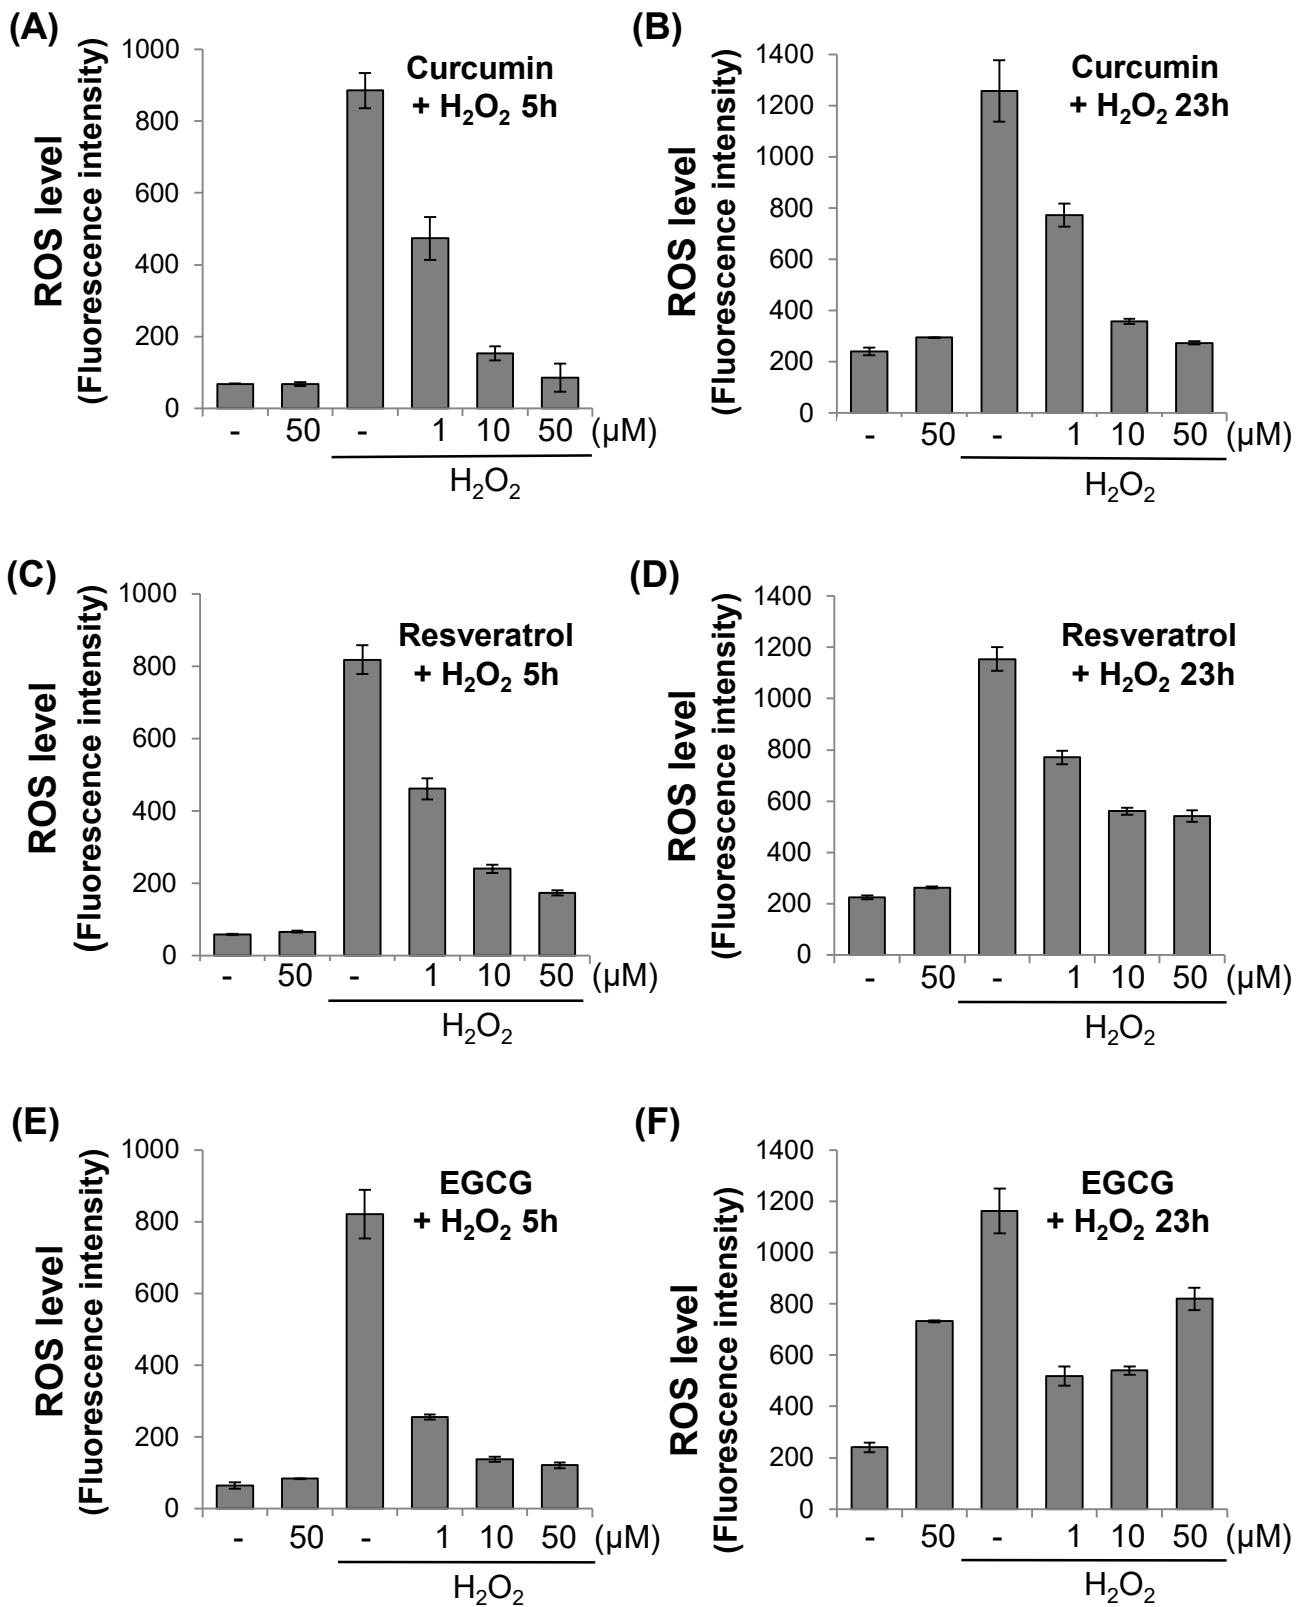

## PPC Pre-treatment

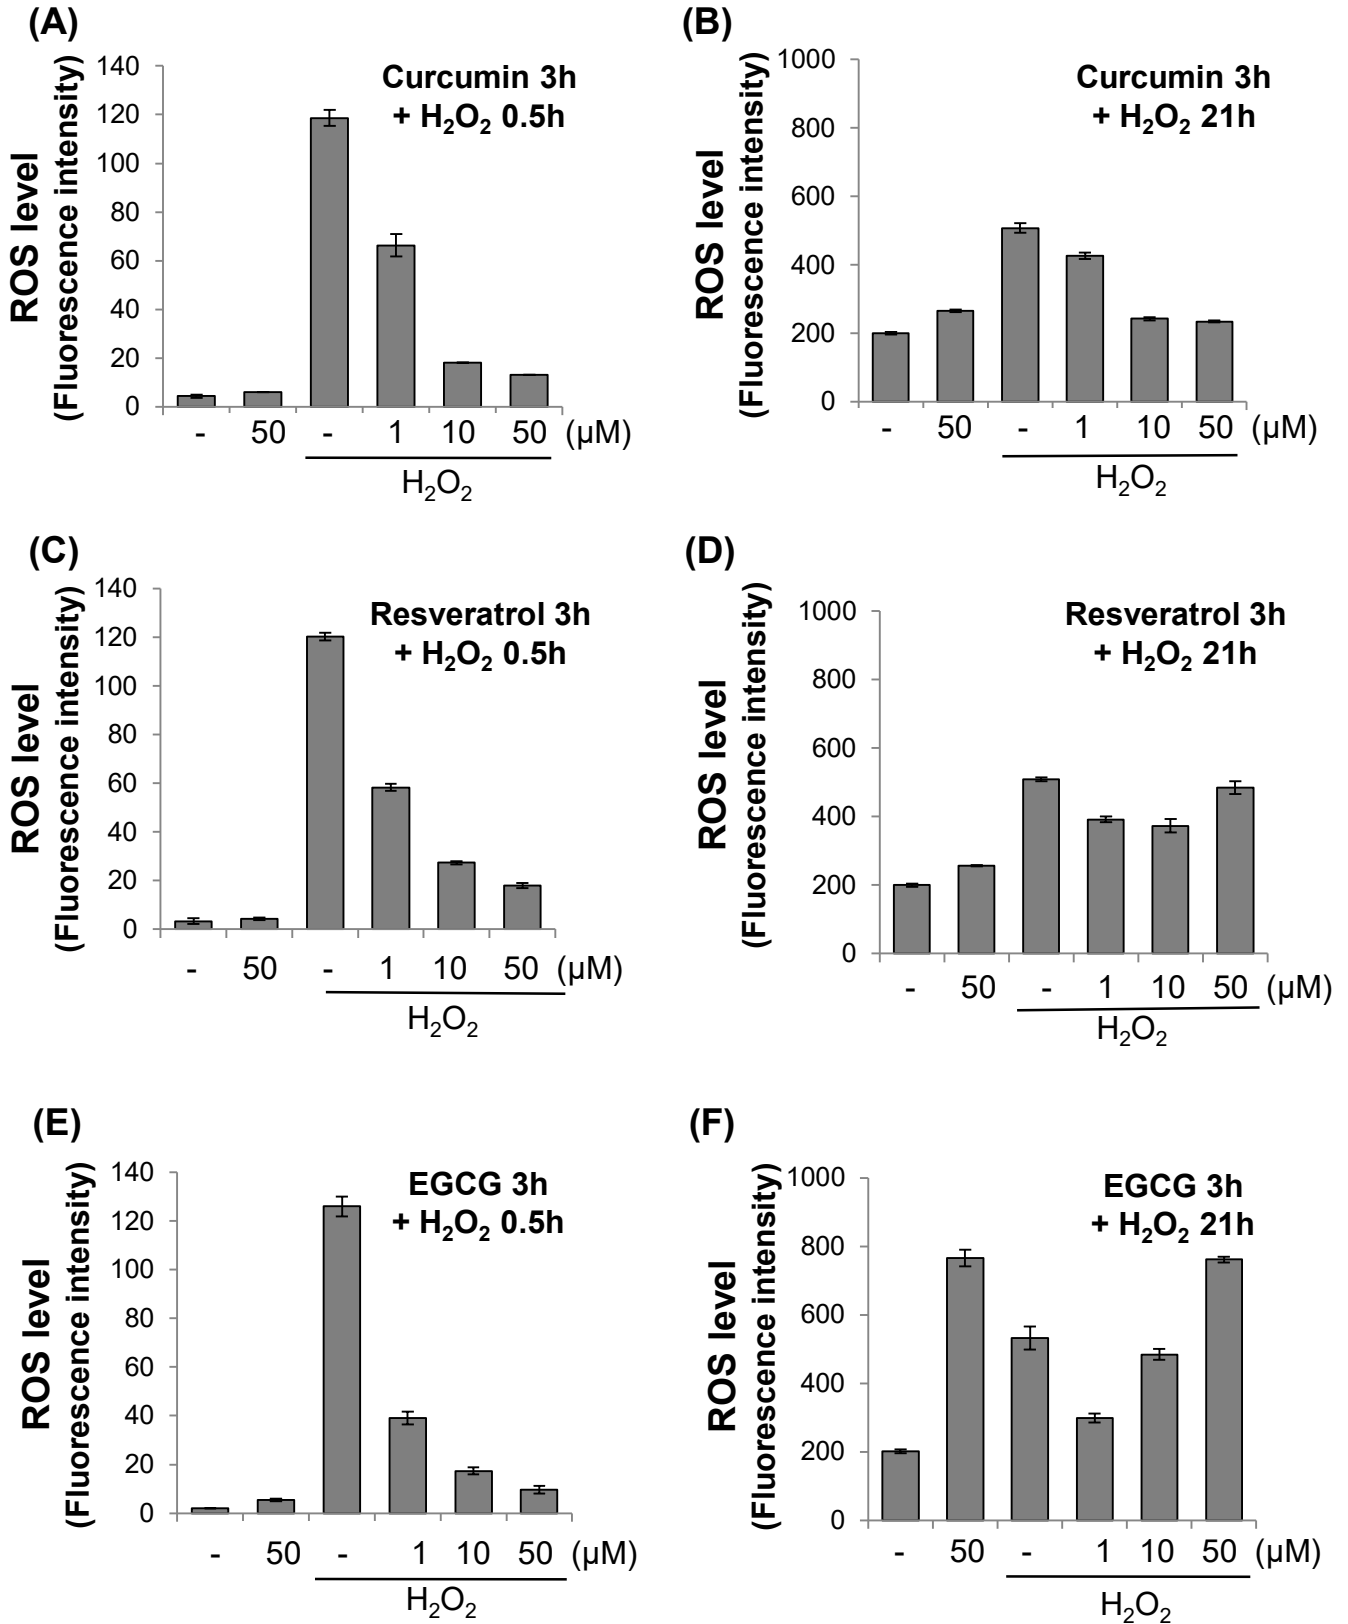

Supplement: mmc1.pdf [file mmc1.pdf]
